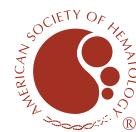

## Erratum

**Thilagar B, Beidoun M, Rhoades R, Kaatz S. COVID-19 and thrombosis: searching for evidence. *Hematology Am Soc Hematol Educ Program*. 2021;2021:621-627.**

Page 621: In the byline, "Mohammad Beidoun" should read "Mohamad Beidoun." The error has been corrected in the published article.

---

© 2022 by The American Society of Hematology  
DOI 10.1182/hematology.2022E03
